# Supplementary material
Source: PubMed Central journal article supplement (PMC7343216)
Supplement: JVI.00184-20-s0004.pdf [file JVI.00184-20-s0004.pdf]

# **Supplementary Material: Macropinocytosis and clathrin-dependent endocytosis play pivotal roles for the infectious entry of Puumala virus**

## **Supplementary Material Legends**

**Live cell movies (Supplementary files).** Time lapse microscopy was recorded with a FluoView 1000 microscope (Olympus) using a 60x objective, NA: 0,5 at 25 °C at a framerate of 2.9 sec/frame. Images show a region of 70 x 70 µm with a frame size of 512 x 512 pixels.

**Supplementary Video S1:** Representative Vero E6 cell labeled with Tau-YFP (video S1) and infected with Dil labelled PUUV particles (video S2). Images were acquired with a Fluoview FV-1000 confocal microscope (Olympus, Japan) using a UPLSAPO 60X Water objective (NA:1.20). Images were recorded every 6.58 sec.

**Supplementary Video S2:** Representative Vero E6 cell labeled with Tau-YFP (video S1) and infected with Dil labelled PUUV particles (video S2). Images were acquired with a Fluoview FV-1000 confocal microscope (Olympus, Japan) using a UPLSAPO 60X Water objective (NA:1.20). Images were recorded every 6.58 sec.

**Supplementary Video S3:** Overlay of video S1 and S2.
